# Supplementary material
Source: PubMed Central journal article supplement (PMC6497579)
Supplement: NIHMS1514318-supplement-3.pdf [file NIHMS1514318-supplement-3.pdf]

Supplementary Table 1: Model of reappraisal context, offer fairness, and stake size on Ultimatum Game offer acceptance among the 4 groups of participants, separating the Punishment context into the Resources and Reputation subtypes. The reference categories were Suicide Attempters (for Group) and the baseline UG block (for Context).

|                                          | Predictors                    | Estimate     | Std. Error  | z            | p            |
|------------------------------------------|-------------------------------|--------------|-------------|--------------|--------------|
| <b>Main effects</b>                      | Time lag                      | -0.04        | 0.07        | -0.52        | 0.606        |
|                                          | Empathy                       | 0.93         | 0.25        | 3.71         | <0.001       |
|                                          | Reputation                    | -2.97        | 0.26        | -11.43       | <0.001       |
|                                          | Resources                     | -0.52        | 0.26        | -2.00        | 0.045        |
|                                          | Fairness                      | 2.17         | 0.10        | 22.65        | <0.001       |
|                                          | Stake                         | 0.03         | 0.07        | 0.45         | 0.655        |
|                                          | Controls vs. Attempters       | 0.02         | 0.54        | 0.03         | 0.973        |
|                                          | Depressed vs. Attempters      | 0.81         | 0.56        | 1.46         | 0.144        |
|                                          | Ideators vs. Attempters       | 0.48         | 0.56        | 0.85         | 0.395        |
| <b>Group × Within-subject predictors</b> |                               |              |             |              |              |
| Controls vs. Attempters                  | <b>Empathy</b>                | <b>1.01</b>  | <b>0.40</b> | <b>2.55</b>  | <b>0.011</b> |
|                                          | Reputation                    | -0.12        | 0.41        | -0.30        | 0.762        |
|                                          | Resources                     | 0.67         | 0.41        | 1.65         | 0.1          |
|                                          | Fairness                      | 0.12         | 0.10        | 1.21         | 0.225        |
|                                          | Stake                         | -0.16        | 0.08        | -1.92        | 0.055        |
| Depressed vs. Attempters                 | <b>Empathy</b>                | <b>-0.15</b> | <b>0.40</b> | <b>-0.36</b> | <b>0.718</b> |
|                                          | Reputation                    | -0.26        | 0.41        | -0.63        | 0.527        |
|                                          | Resources                     | 0.37         | 0.42        | 0.88         | 0.381        |
|                                          | Fairness                      | -0.13        | 0.10        | -1.32        | 0.186        |
|                                          | Stake                         | -0.07        | 0.08        | -0.79        | 0.43         |
| Ideators vs. Attempters                  | <b>Empathy</b>                | <b>0.87</b>  | <b>0.42</b> | <b>2.10</b>  | <b>0.036</b> |
|                                          | Reputation                    | -0.58        | 0.43        | -1.37        | 0.171        |
|                                          | Resources                     | 0.48         | 0.42        | 1.13         | 0.258        |
|                                          | Fairness                      | 0.21         | 0.11        | 2.01         | 0.044        |
|                                          | Stake                         | -0.10        | 0.09        | -1.12        | 0.264        |
| <b>Reappraisal × Fairness</b>            | Empathy × Fairness            | -1.33        | 0.10        | -12.92       | <0.001       |
|                                          | Reputation × Fairness         | -1.27        | 0.11        | -11.57       | <0.001       |
|                                          | Resources × Fairness          | -0.90        | 0.11        | -7.94        | <0.001       |
| <b>Reappraisal × Stake</b>               | Empathy × Stake               | 0.08         | 0.08        | 0.95         | 0.341        |
|                                          | Reputation × Stake            | 0.16         | 0.09        | 1.73         | 0.083        |
|                                          | Resources × Stake             | 0.20         | 0.10        | 2.06         | 0.039        |
| <b>Fairness × Stake</b>                  | Fairness × Stake              | -0.13        | 0.06        | -2.10        | 0.035        |
| <b>Reappraisal × Fairness × Stake</b>    | Empathy × Fairness × Stake    | 0.15         | 0.09        | 1.72         | 0.086        |
|                                          | Reputation × Fairness × Stake | 0.04         | 0.10        | 0.43         | 0.67         |
|                                          | Resources × Fairness × Stake  | 0.14         | 0.10        | 1.32         | 0.187        |

|                  |      |      |      |        |
|------------------|------|------|------|--------|
| <b>Intercept</b> | 1.57 | 0.35 | 4.44 | <0.001 |
|------------------|------|------|------|--------|

---

---

Note: Terms of *a priori* interest are bolded.
