# Supplementary material
Source: PubMed Central journal article supplement (PMC6497579)

Logit Probability of Offer Acceptance

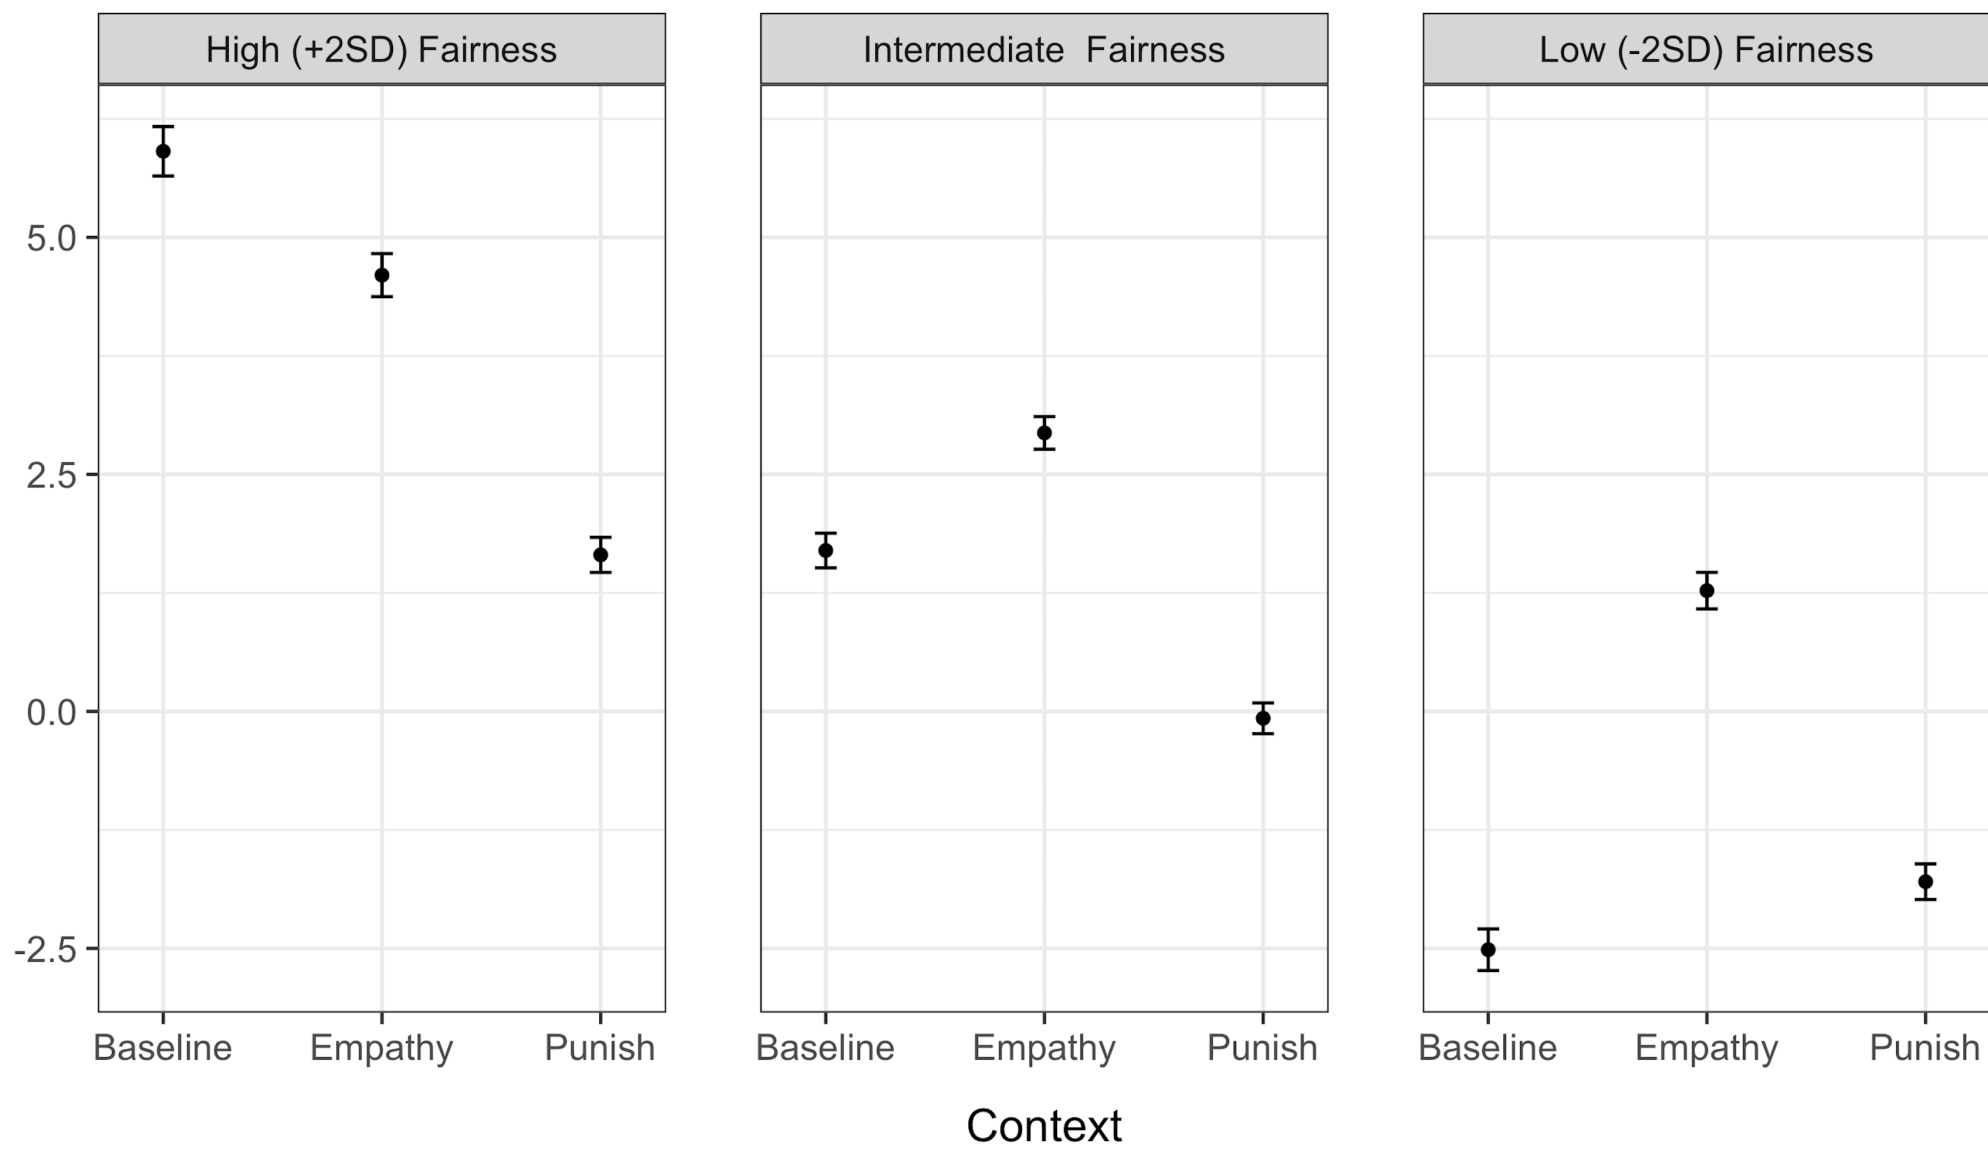

Supplement: NIHMS1514318-supplement-1.pdf [file NIHMS1514318-supplement-1.pdf]

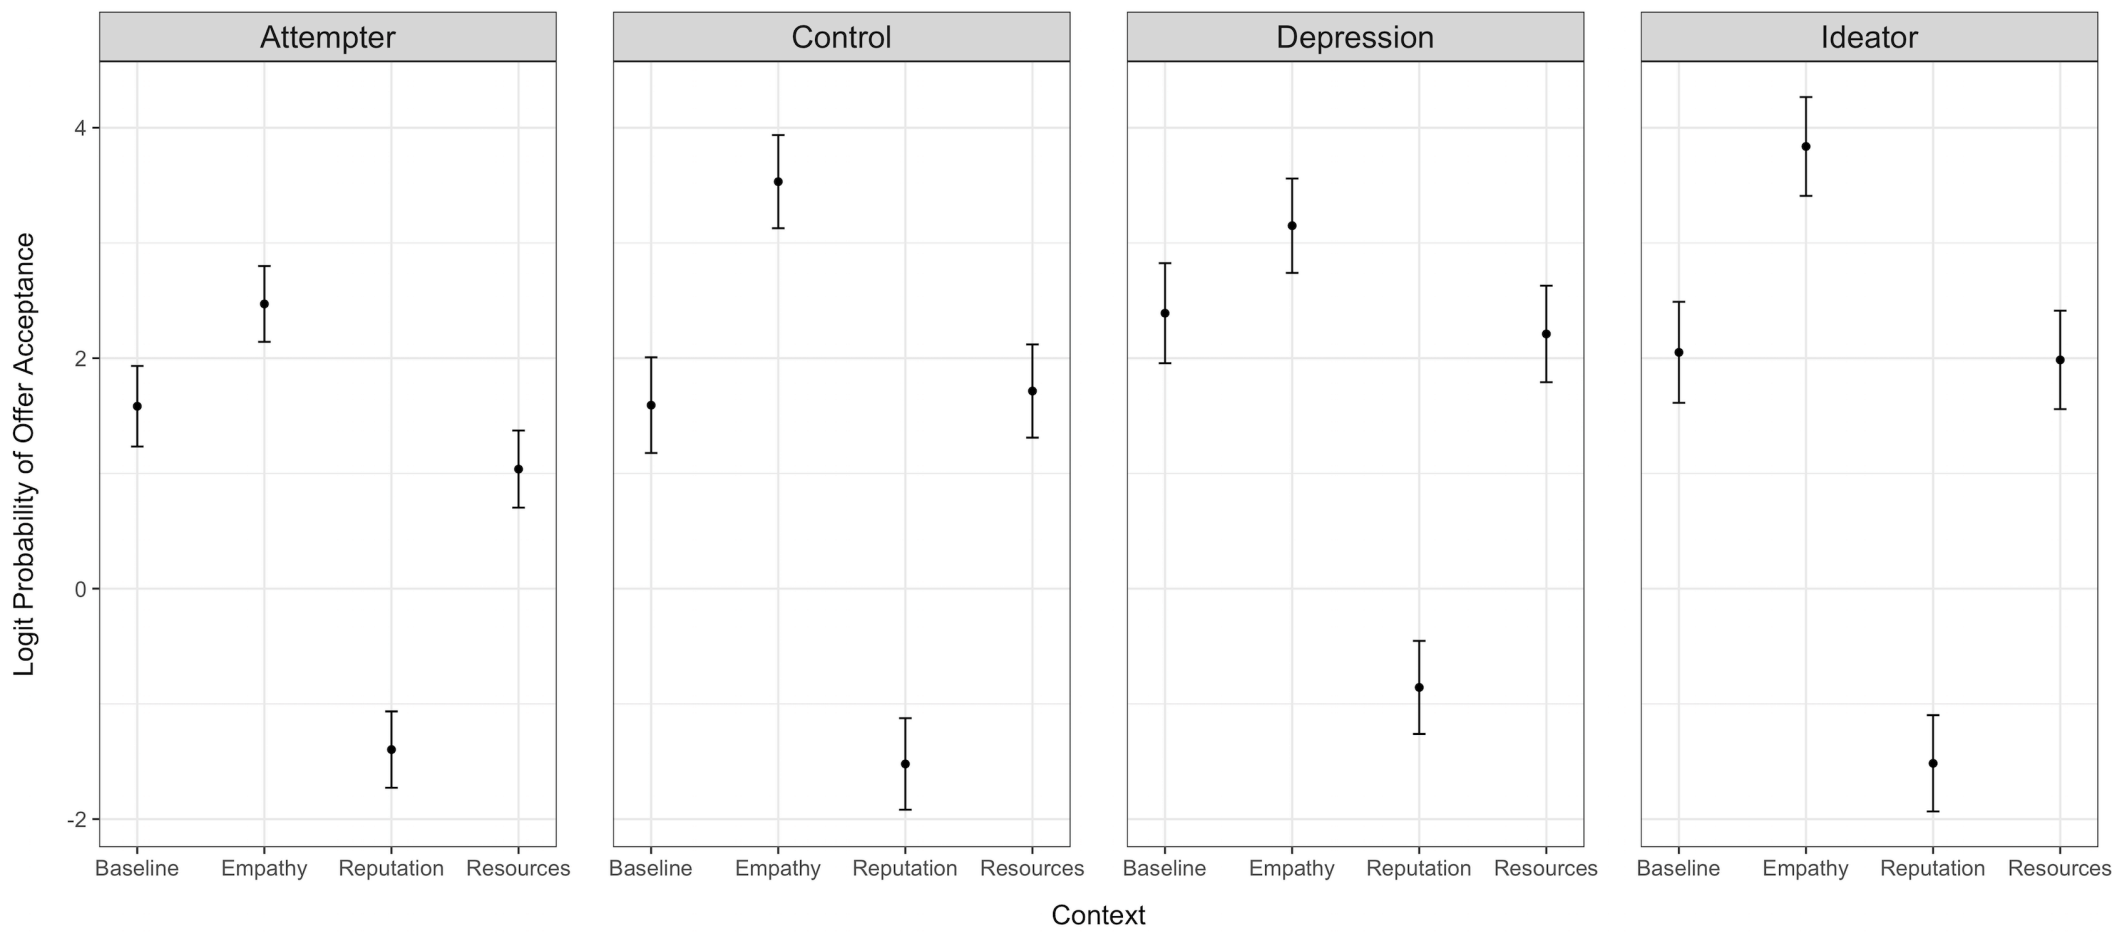

Supplement: NIHMS1514318-supplement-2.pdf [file NIHMS1514318-supplement-2.pdf]
